# Supplementary material for: How Changes in Reimbursement Practices Influence the Financial Sustainability of Medicine Policy: Lessons Learned from Slovakia
Source: Front Pharmacol. 2019 Jun 13;10:664. doi: 10.3389/fphar.2019.00664 (PMC6584090; doi:10.3389/fphar.2019.00664)
Supplement: Supplementary file 1 [file Table_1.xlsx]

## Sheet: Sheet1
ATC group	Date of submision	Submitted by	Name of medicinal product	Expected financial expenditure in 24 months (EUR)	Types of finished reimbursement decisions (December 31, 2018)
A16AX04	2018-01-31	Swedish Orphan Biovitrum International AB	Orfadin	392714	Positive
L01XC26	2018-01-31	Pfizer Limited	BESPONSA	1042204	Positive
L01XC27	2018-02-26	Eli Lilly Nederland B.V.	Lartruvo	3583698	Positive
L01XC12	2018-02-28	Takeda Pharma A/S	ADCETRIS	6317438	Positive
L01XE12	2018-02-28	Genzyme Europe B.V.	Caprelsa	406413	Positive
L01XE27	2018-02-28	Janssen - Cilag International N.V.	IMBRUVICA	2547972	Negative
L04AA25	2018-02-28	Alexion Europe SAS	Soliris	12248600	Negative
L04AC08	2018-03-21	NOVARTIS EUROPHARM LIMITED	Ilaris	2294630	Positive
C02KX05	2018-03-29	Bayer AG	Adempas	1725758	Positive
L01XE18	2018-03-29	NOVARTIS EUROPHARM LIMITED	Jakavi	1160420	Negative
L01BB02	2018-03-31	Nova Laboratories Limited	Xaluprine	62671.4	Positive
M09AX07	2018-04-11	BIOGEN IDEC LIMITED	Spinraza	25498959	Positive
B02BD04	2018-04-30	Baxalta Innovations GmbH	RIXUBIS	1082202	Positive
L01XC13	2018-04-30	Roche Registration GmbH.	Perjeta	7007799	Positive
L01CA05	2018-05-04	PIERRE FABRE MEDICAMENT SAS	Javlor	3984372	Positive
A16AB09	2018-05-09	Shire Human Genetics Therapies AB	Elaprase	2306096	Positive
B02BD04	2018-05-10	CSL Behring GmbH	IDELVION	1212996	stop process
N04BA02	2018-05-16	AbbVie s.r.o.	Duodopa	5645640	Positive
A16AB08	2018-05-31	BioMarin Europe Limited	Naglazyme	1.64696e+06	stop process
L01XE29	2018-05-31	Eisai Europe Limited	LENVIMA	2681395	Positive
L01XX43	2018-05-31	Roche Registration GmbH.	Erivedge	1452817	Positive
S01XA21	2018-05-31	Orphan Europe SARL	Cystadrops	252753	Positive
S01XA19	2018-06-21	Chiesi Pharmaceutici S.p.A.	Holoclar	887046	Negative
L01XE26	2018-06-22	IPSEN PHARMA S.A.S	COMETRIQ	2700000	Positive
L01XE21	2018-06-26	Bayer AG	Stivarga	901149	Negative
A16AB12	2018-06-27	BioMarin Europe Limited	Vimizim	1034530	stop process
A07XA05	2018-06-29	IPSEN PHARMA S.A.S	Xermelo	1794521	Positive
B02BX06	2018-06-29	Roche Registration GmbH.	Hemlibra	2042133	stop process
N07XX04	2018-06-29	UCB Pharma SA	Xyrem	215497	Positive
A16AX09	2018-07-12	Horizon Pharma Ireland Limited	RAVICTI	226552	Positive
B02AB02	2018-07-16	CSL Behring GmbH	Respreeza	1123391	Positive
B01AC09	2018-07-31	Actelion Registration Limited	VELETRI	819330	Positive
L01XE15	2018-07-31	Roche Registration GmbH.	Zelboraf	7521415	In process
L01XE23	2018-07-31	Novartis Europharm Limited	Tafinlar	9820744	In process
L01XE25	2018-07-31	Novartis Europharm Limited	Mekinist	7364552	In process
L01XE38	2018-07-31	Roche Registration GmbH.	Cotellic	2766784	In process
L01XX46	2018-07-31	AstraZeneca AB	Lynparza	2260392	Positive
L04AC03	2018-07-31	Swedish Orphan Biovitrum AB	Kineret	283045	Positive
L01XX52	2018-08-16	AbbVie Ltd	Venclyxto	6224541	Positive
M09AX03	2018-08-16	PTC Therapeutics International Limited	Translarna	2528308	Positive
L01XE39	2018-08-17	Novartis Europharm Limited	Rydapt	2379420	Positive
L01XC14	2018-08-24	Roche Registration GmbH.	Kadcyla	8835750	Positive
A16AX08	2018-09-19	Shire Pharmaceuticals Ireland Limited	Revestive	1485959	Negative
L01XC31	2018-09-28	Merck Europe B.V.	Bavencio	792011	Positive
N07XX05	2018-10-29	BioMarin International Limited	FIRDAPSE	194977	In process
J05AX18	2018-10-31	Merck Sharp & Dohme B.V.	PREVYMIS	1.04305e+06	In process
L01XC19	2018-10-31	Amgen Europe B.V.	BLINCYTO	1.79316e+06	In process
M05BX05	2018-11-12	KYOWA KIRIN Holdings B.V.	CRYSVITA	3385792	In process
L01XE28	2018-11-29	Novartis Europharm Limited	Zykadia	587305	In process
A16AX14	2018-11-30	Amicus Therapeutics UK Ltd.	Galafold	1.30614e+06	In process
D11AH05	2018-11-30	sanofi-aventis groupe	Dupixent	1433589	In process
L01XE36	2018-11-30	Roche Registration GmbH.	Alecensa	2412983	In process
L03AX15	2018-11-30	Takeda France SAS	MEPACT	673941	In process
N06BX13	2018-11-30	Santhera Pharmacuticals GmbH	Raxone	1.19326e+06	In process
L01XE41	2018-12-18	PIERRE FABRE MEDICAMENT SAS	Mektovi	7.2547e+06	In process
L01XE46	2018-12-18	PIERRE FABRE MEDICAMENT SAS	Braftovi	7348792	In process
L01XE16	2018-12-19	Pfizer Europe MA EEIG	XALKORI	2532997	In process
L01XE18	2018-12-20	Novartis Europharm Limited	Jakavi	813490	In process
L01CD04	2018-12-31	sanofi-aventis groupe	Jevtana	737948	In process
